# Supplementary material
Source: publisher figshare collection journal article supplement (https://brill.figshare.com/ndownloader/files/22784780)
Supplement: Supplementary file 1 [file 22784780]

# **A Grounded Theory on the Relation of Time Awareness and Perceived Valence**

**Sonja Ehret<sup>1,\*</sup>, Anna K. Trukenbrod<sup>2</sup>, Vera Gralla<sup>1</sup> and Roland Thomaschke<sup>1</sup>**

<sup>1</sup>Cognition, Action, and Sustainability Unit, Department of Psychology, Albert-Ludwigs-

University of Freiburg, Engelbergerstr. 41, 79085 Freiburg, Germany

<sup>2</sup>Department of Psychology and Ergonomics, Technische Universität Berlin, Berlin, Germany

Received 1 November 2019; accepted 22 May 2020

\* To whom correspondence should be addressed. E-mail: [sonja.ehret@psychologie.uni-freiburg.de](mailto:sonja.ehret@psychologie.uni-freiburg.de)

**Supplementary Material**

## **Text S1**

### **Interview questions**

#### *Part 1: Time experience*

Key question: Tell me, how did you experience the time in the library?

How would you describe the passage of time?

How did your experience of time change over the course of time? What were the triggers?

To what extent did you want to know the time?

Have there been moments when you have forgotten time? Why was that? Can you describe this feeling more precisely?

Were there moments when time was particularly present to you? What was the reason for that?

#### *Part 2: Dealing with doing nothing*

Key question: What have you been thinking about during that time?

How was it for you to sit that long?/How did you explore the space?

What did you expect from your time in the library?

To what extent did you have strategies for dealing with the time?

What was it like for you to stay in the library for so long?

#### *Part 3: Room atmosphere*

Key question: How did you feel about the atmosphere of the library?

What did you notice in particular? (Positive? Negative?)

How did the atmosphere of the room affect your own feelings/well-being?

What do you associate with libraries/this library?

#### *Part 4: Comparison of sessions*

Key question: If you think about the first session, what was different than today?

How did the passage of time feel different?

How has your awareness of time changed?

Why did the passage of time feel different on the two days?

How would you generally compare the atmosphere between the two sessions?

What can you personally take out of this study?

## Text S2

Results of the Latent Profile Analysis (LPA) for the dependent variables time awareness and perceived valence

### 1. Analysis of Model Fit

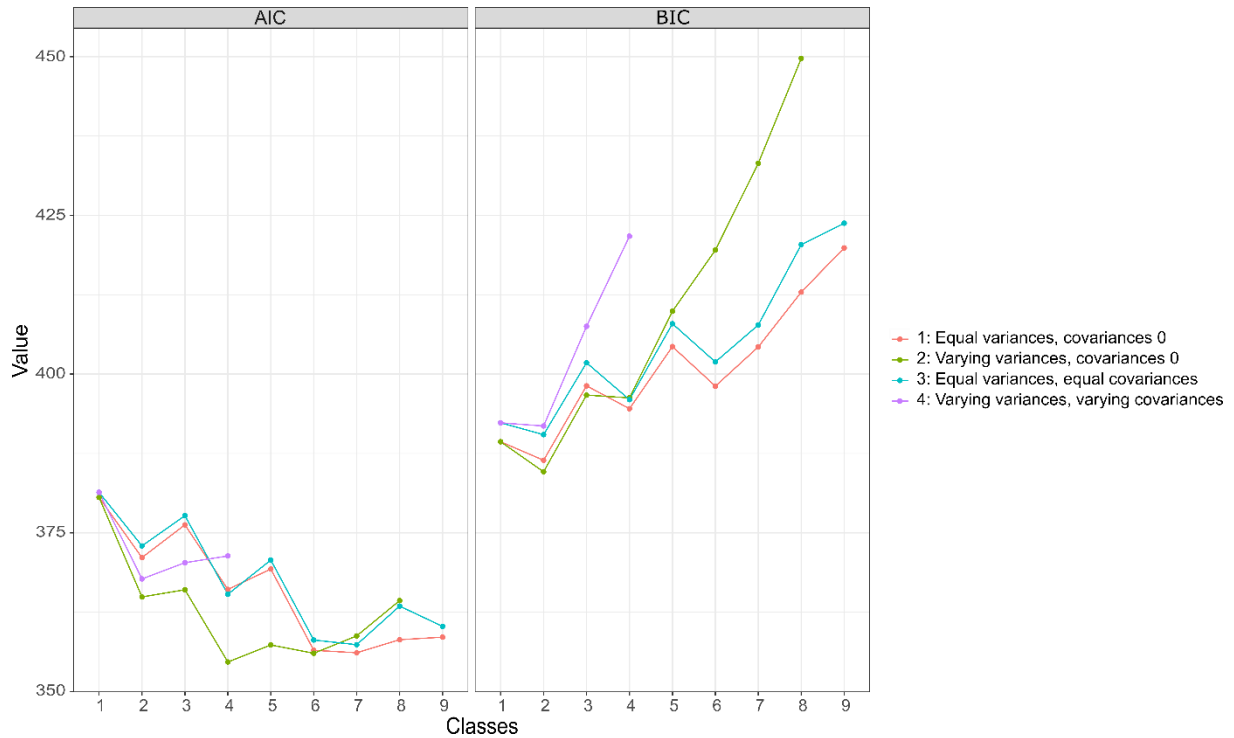

**Figure 1.** Model fit comparison of Akaike information criterion (AIC) and Bayesian information criterion (BIC) for one to nine clusters and for four models with different parameter estimations for variances and covariances. Lower values indicate better model fit. The lowest AIC can be found for a four-cluster solution with varying variances and covariances fixed to zero (2). The lowest BIC suggests a two-cluster solution for the same model.

**Table 1.**

Summary of model fit criteria for one- to five-cluster solutions for LPA with varying variances and covariances fixed to zero.

| Cluster | LogLik  | AIC           | BIC           | Entropy | BLRT <sub>p</sub> |
|---------|---------|---------------|---------------|---------|-------------------|
| 1       | -186.29 | 380.58        | 389.34        | 1       | —                 |
| 2       | -173.45 | 364.90        | <b>384.61</b> | 0.84    | 0.010             |
| 3       | -169.02 | 366.04        | 396.69        | 0.89    | 0.317             |
| 4       | -158.33 | <b>354.66</b> | 396.26        | 0.90    | 0.069             |
| 5       | -154.67 | 357.34        | 409.89        | 0.91    | 0.475             |

LogLik = Log-Likelihood, AIC = Akaike information criterion, BIC = Bayesian information criterion, BLRT\_p = Bootstrap Likelihood-Ratio Test. Lowest AIC and BIC values are printed in bold.

## 2. Further Analysis of Two-Cluster Solution (Varying Variances, Covariances 0)

**Table 2.**

Summary of standardized cluster centers for time awareness and perceived valence and mixing probabilities for two-cluster solution.

| Cluster        | Time awareness | Perceived valence | Mixing probabilities |
|----------------|----------------|-------------------|----------------------|
| 1 ( $n = 39$ ) | -0.64          | 0.18              | 0.61                 |
| 2 ( $n = 27$ ) | 1.01           | -0.28             | 0.39                 |

$n$  refers to the number of observations, not to the number of participants.

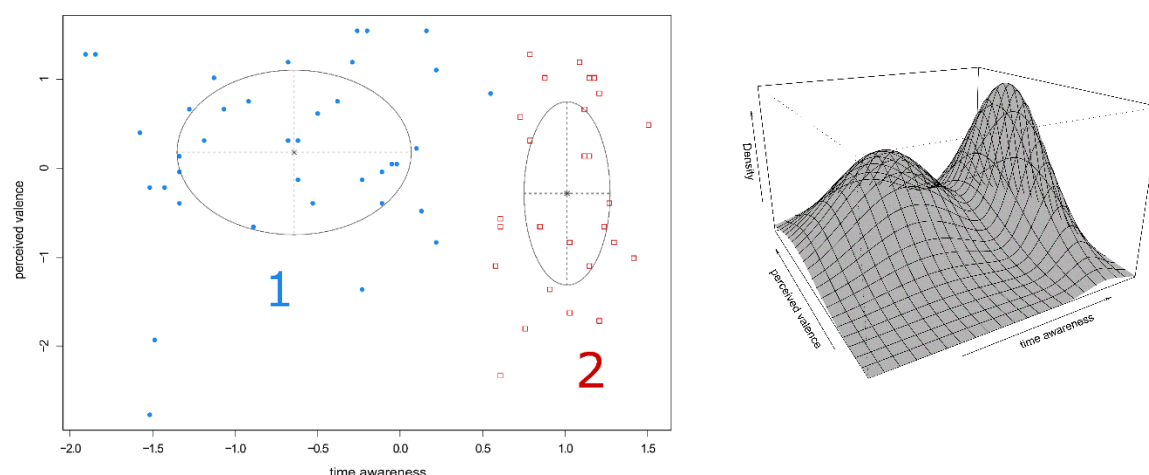

**Figure 2.** Scatterplot and density distribution of 66 observations grouped by two clusters on the variables of time awareness and perceived valence. Values are standardized.

### 3. Further Analysis of Four-Cluster Solution (Varying Variances, Covariances 0)

**Table 3.**

Summary of standardized cluster centers for time awareness and perceived valence and mixing probabilities for four-cluster solution.

| Cluster        | Time Awareness | Perceived valence | Mixing probability |
|----------------|----------------|-------------------|--------------------|
| 1 ( $n = 3$ )  | -1.51          | -1.88             | 0.04               |
| 2 ( $n = 15$ ) | 0.97           | -1.05             | 0.23               |
| 3 ( $n = 12$ ) | 1.04           | 0.77              | 0.17               |
| 4 ( $n = 36$ ) | -0.61          | 0.34              | 0.56               |

$n$  refers to the number of observations, not to the number of participants.

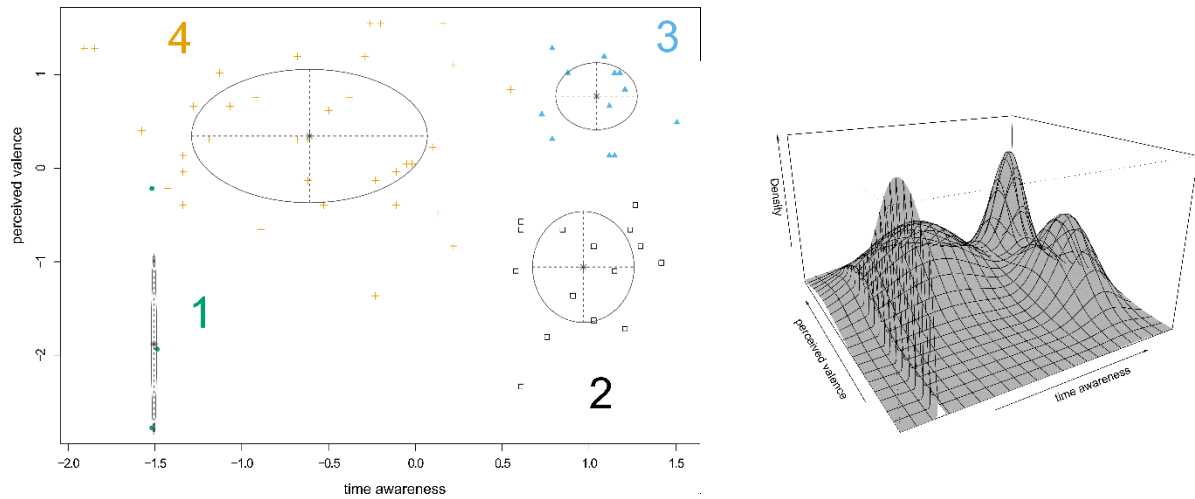

**Figure 4.** Scatterplot and density distribution of 66 observations grouped by four clusters on the variables of time awareness and perceived valence. Values are standardized.

**Table S1.**

Category system

| Main category | Codes                         | Subcodes              | Definition and Anchor Quotation                                                                                                                                                                                                                                                                                                                                                                                   |
|---------------|-------------------------------|-----------------------|-------------------------------------------------------------------------------------------------------------------------------------------------------------------------------------------------------------------------------------------------------------------------------------------------------------------------------------------------------------------------------------------------------------------|
| Person        |                               |                       | Description of the individual experience                                                                                                                                                                                                                                                                                                                                                                          |
|               | Perceived valence of the stay |                       | Evaluation of the experience                                                                                                                                                                                                                                                                                                                                                                                      |
|               |                               | Pleasant stay         | Positive evaluation of the overall stay<br><br>Actually quite pleasant. I just got a little bored and tired in the end, yes. But apart from this it was okay. P16-1-E                                                                                                                                                                                                                                             |
|               |                               | Evaluation of sitting | <u>Unspecific</u> evaluation of the stay in the sitting condition<br><br>For me, it is a neutral feeling to sit as it is already neutral by now because I already sit more than I stand in everyday life. P20-S-2                                                                                                                                                                                                 |
|               |                               | Sitting negative      | Negative evaluation of the stay regarding the sitting condition<br><br>I: How did you feel sitting for such a long time?<br>P: Strenuous!<br>I: Strenuous?<br>P: Yes! My bottom hurt at some point, and then it was difficult to remain like this, because I had to find another position and the people were glancing at me a little strangely: Why are you just sitting there and doing nothing? Yes... P17-S-2 |
|               |                               | Sitting positive      | Positive evaluation of the stay regarding the sitting condition<br><br>I: So please tell me, how did you experience the time in the library?                                                                                                                                                                                                                                                                      |

| Main category | Codes | Subcodes                   | Definition and Anchor Quotation                                                                                                                                                                                                                                                                                                                        |
|---------------|-------|----------------------------|--------------------------------------------------------------------------------------------------------------------------------------------------------------------------------------------------------------------------------------------------------------------------------------------------------------------------------------------------------|
|               |       |                            | P: For me, it was a pleasant time as I had time to sort my thoughts. Besides, the chairs are pretty comfortable. It was a pity that I couldn't sit at a window. Yoar. I found it interesting. P8-S-1                                                                                                                                                   |
|               |       | Evaluation of exploring    | Evaluation of exploring                                                                                                                                                                                                                                                                                                                                |
|               |       | Exploring positive         | Positive evaluation of the stay regarding the exploring condition<br><br>Quite pleasant, quite nice actually. That was a contrast to the first part of the experiment. Entirely, it was a pleasant and positive stay. Which of course could be due to the task right from the start. P 9-E-2                                                           |
|               |       | Exploring negative         | Negative evaluation of the stay regarding the exploring condition<br><br>And even now it was such a must-feeling. I have to walk around here. I have to look at something to get this finished. And this must-feeling, how can I describe this more precisely? Maybe... no, I can't describe it more precisely, maybe a feeling of compulsion. P23-E-1 |
|               |       | Interest/curiosity         | Interest and curiosity for the library<br><br>[...] that I found myself in a new environment that was first of all interesting, and then there was that curiosity to find out how it feels like, what it looks like. P1-E-2                                                                                                                            |
|               |       | Comparison of the sessions | Explicit comparison of the two sessions regarding the library or the conditions<br><br>Regarding the sense of time, so definitely on Monday time passed much much slower. Yes, today it was definitely faster, and this might have been due to the task. And maybe due to the fact that I know                                                         |

| Main category | Codes | Subcodes                                  | Definition and Anchor Quotation                                                                                                                                                                                                                                                                                                                    |
|---------------|-------|-------------------------------------------|----------------------------------------------------------------------------------------------------------------------------------------------------------------------------------------------------------------------------------------------------------------------------------------------------------------------------------------------------|
|               |       |                                           | this place, the Grimm-Zentrum, a little better than the StaBi. Yes. P9-E-2                                                                                                                                                                                                                                                                         |
|               |       |                                           | The StaBi-Library is prioritized                                                                                                                                                                                                                                                                                                                   |
|               |       | Prioritizing the Staatsbibliothek-Library | I: And how would you compare the atmosphere?<br>P: I don't know. I found it more pleasant in the StaBi. Because maybe it was somehow calmer, and then I thought the people are calmer and happier, too in this environment. P21-S-2                                                                                                                |
|               |       |                                           | Preference of the exploring condition over the sitting condition                                                                                                                                                                                                                                                                                   |
|               |       | Prioritizing exploring                    | Yes, it was very pleasant, way better than last time because I could keep myself busy. It was interesting because I hadn't known the place before. I got a little annoyed that I only get to know it now, at the very end of my studies, because it is so empty and chances are way better to learn in a quiet place. Yeah, actually nice. P27-E-2 |
|               |       |                                           | Preference of the sitting condition over the exploring condition                                                                                                                                                                                                                                                                                   |
|               |       | Prioritizing sitting                      | Well, for me it's like at the doctor's or at the citizen's office: Waiting, just sitting around. I have no problem with that. It was quite relaxed, and I even felt less stressed than in the first part of the experiment in the StaBi-Library. P20-S-2                                                                                           |
|               |       |                                           | The Grimm-Library is prioritized over the StaBi-Library                                                                                                                                                                                                                                                                                            |
|               |       | Prioritizing the Grimm-Library            | [...] here, the environment was way better and way more beautiful [...] P23-S-2                                                                                                                                                                                                                                                                    |
|               |       |                                           | General mental activity                                                                                                                                                                                                                                                                                                                            |
| Thoughts      |       |                                           | I had thoughts about other people, thoughts concerning the entire joint of library, thoughts about                                                                                                                                                                                                                                                 |

| Main category | Codes  | Subcodes                                                                              | Definition and Anchor Quotation                                                                                                                                                                                                                |
|---------------|--------|---------------------------------------------------------------------------------------|------------------------------------------------------------------------------------------------------------------------------------------------------------------------------------------------------------------------------------------------|
|               |        |                                                                                       | my role as participant of the experiment. This is what I was thinking about. And I was thinking about what I was reading. P9-S-1                                                                                                               |
|               |        | Thoughts concerning the condition inside the library or the psychological stress test | Mental activity concerning the task in the library or the task after the stay<br><br>What you meant with checking the working memory, that's what I was thinking about for short as well. But not for the whole time. P31-S-1                  |
|               |        | Thoughts concerning the experimental setting                                          | Mental activity concerning being in an experiment<br><br>Because in my mind there was again that I have this pedometer with me, but unfortunately I do not know yet what the background of the experiment and the research interest is. P9-E-2 |
|               |        | Thoughts concerning the library                                                       | Mental activity concerning the library<br><br>In the beginning I was thinking about the library itself. P31-S-1                                                                                                                                |
|               |        | Thoughts concerning personal life                                                     | Mental activity concerning daily issues or private life<br><br>We're planning a street festival in my collective and, that means it is in three weeks from now. P8-S-1                                                                         |
|               | States |                                                                                       |                                                                                                                                                                                                                                                |
|               |        | Complex                                                                               | States that are not described as only mental, emotional, or physiological                                                                                                                                                                      |
|               |        | Boredom                                                                               | Explicit description of boredom, "not so exciting" or "not interesting anymore"<br><br>Then, what I was reading started to bore me, and then the time passed really slowly again, also                                                         |

| Main category | Codes | Subcodes                       | Definition and Anchor Quotation                                                                                                                                                                                                                                                                              |
|---------------|-------|--------------------------------|--------------------------------------------------------------------------------------------------------------------------------------------------------------------------------------------------------------------------------------------------------------------------------------------------------------|
|               |       |                                | because I was thinking that she [the experimenter] should be returning by now. P9-S-1                                                                                                                                                                                                                        |
|               |       | Loss of control                | Experiencing a loss of control<br><br>You can't control for how long you will sit there and I think people in general probably like to be in control. In this moment, there's nothing you can do as you also shouldn't look at the clock. P27-S-1                                                            |
|               |       | Freedom                        | Freedom of doing or not to do what you want<br><br>Well, I could move! I could read books, I was free. P17-E-2                                                                                                                                                                                               |
|               |       | Description of spatial freedom | A state is described as spatial freedom<br><br>Because then the thoughts start to drift, because you really have nothing else to do. Or there's just nothing else happening that captures the attention. And then um you are in a little bit of meditative and in a „time-space-free” space somehow. P32-S-1 |
|               |       | Waiting                        | A state is explicitly described as „waiting” with positive or negative valence<br><br>Well, for me it's like at the doctor's or at the citizen's office: Waiting, just sitting around. I have no problem with that. P20-S-1                                                                                  |
|               |       | Mental state                   | Description of mental states                                                                                                                                                                                                                                                                                 |
|               |       | Wandering or deepened thoughts | Absorbed in an activity or thought or wandering thoughts<br><br>Well, while reading now. Especially while reading when I was absorbed. And in the meanwhile I was                                                                                                                                            |

| Main category | Codes           | Subcodes                      | Definition and Anchor Quotation                                                                                                                                                                                                    |
|---------------|-----------------|-------------------------------|------------------------------------------------------------------------------------------------------------------------------------------------------------------------------------------------------------------------------------|
|               |                 |                               | looking at the architecture and so let my thoughts wander, and also then. P4-S-1                                                                                                                                                   |
|               |                 | Concentration/attention/focus | Attention, focus and the ability to concentrate are explicitly described<br><br>Well, of course, while reading it gets better again. You concentrate on a certain content, but as you walk around without orientation[...] P12-E-2 |
|               |                 | Difficulties to concentrate   | Difficulties to concentrate<br><br>And then I also couldn't concentrate the whole time and then I was just thinking about things and then, yes. P31-S-1                                                                            |
|               |                 | Meditation                    | Explicitly reported "meditation" or "meditative experience"<br><br>And then I don't think about time. Then you have such a "relaxed-body-thing" just sitting there, like meditation in the end. P8-S-1                             |
|               | Physical state  |                               | Physical sensations<br><br>Exhausting, especially because my neck hurt and I had to move then, and also got up briefly. P16-S-2                                                                                                    |
|               |                 | Fatigue                       | Fatigue, tiredness, physical exhaustion<br><br>Then in the end, time has pretty dragged on and tiredness raised again and this was not only just positive anymore. P9-S-1                                                          |
|               |                 | Hunger                        | Hunger<br><br>The only thing was that I got hungry at some point which was a little... So I thought „Yummy, food“, but despite this it was rather relaxed. P32-S-1                                                                 |
|               | Emotional state |                               | Unspecific emotional state                                                                                                                                                                                                         |

| Main category | Codes | Subcodes       | Definition and Anchor Quotation                                                                                                                                                                                                                                                                             |
|---------------|-------|----------------|-------------------------------------------------------------------------------------------------------------------------------------------------------------------------------------------------------------------------------------------------------------------------------------------------------------|
|               |       |                | I think during the time I also thought sometimes: What the fuck, I don't want to do this anymore. But now, retrospectively, I think it wasn't that long, can be done once in a while. P27-S-1                                                                                                               |
|               |       | Calmness/rest  | Description of calmness and relaxed or soothing experience<br><br>Just relaxed and didn't have anything to do. And therefore, in such a serene ... a little bit bored, but being bored can sometimes be good, too. P32-S-1                                                                                  |
|               |       | Stress/tension | Unspecific tense state<br><br>And even now it was such a must-feeling. I have to walk around here. I have to look at something to get this finished. And this must-feeling, how can I describe this more precisely? Maybe... no, I can't describe it more precisely, maybe a feeling of compulsion. P23-E-1 |
|               |       | Insecurity     | Description of insecurity<br><br>In the first experiment. That's when I was also a lot more concerned, because I didn't exactly know what was coming up. P20-S-2                                                                                                                                            |
|               |       | Restlessness   | Description of restlessness<br><br>Yes. And actually, this whole time has been about where I go. It was very, the whole time was a little restless. P8-E-2                                                                                                                                                  |
|               |       | Impatience     | Description of impatience<br><br>I got tired quite quickly, and because there was nothing I could do to distract myself, I also became — yes, almost impatient in the end. Because I                                                                                                                        |

| Main category | Codes                       | Subcodes                         | Definition and Anchor Quotation                                                                                                                                                                                                                                                                    |
|---------------|-----------------------------|----------------------------------|----------------------------------------------------------------------------------------------------------------------------------------------------------------------------------------------------------------------------------------------------------------------------------------------------|
|               |                             |                                  | finally wanted the hour or the hour and a half to come to an end. P16-S-2                                                                                                                                                                                                                          |
|               |                             | Annoyance                        | Description of annoyance<br><br>[...] as time went by, passively sitting around and observing others doing their work got more and more annoying. P12-S-1                                                                                                                                          |
|               | Evaluation of doing nothing |                                  | Unspecific description/evaluation of doing nothing<br><br>I: And now here in the StaBi — do you think that the atmosphere has somehow affected you? Or on how you feel?<br>P: No. More time itself. In a way that you take your time for doing nothing. This, and the colors of the chairs. P8-S-1 |
|               |                             | Doing-nothing positive           | Positive evaluation of doing nothing<br><br>Uhm, I found it actually quite relaxing only sitting there and I think also the situation in which I could not do anything and in I am also here to just sit, I found it actually quite relaxing. P32-S-1                                              |
|               |                             | Doing-nothing negative           | Negative evaluation of doing nothing<br><br>[...] as time went by, passively sitting around and observing others doing their work got more and more annoying. Yeah, I'm quite not used to just doing nothing. P12-S-1                                                                              |
|               |                             | Urge to use the time effectively | Avoidance of doing nothing, urge to use the time effectively<br><br>I: And to what extent did you then feel the need to know the time?<br>P: That was okay. I felt more the need to behave somehow productively or grab a book or I don't                                                          |

| Main category | Codes                              | Subcodes              | Definition and Anchor Quotation                                                                                                                                                                                                                                                                                   |
|---------------|------------------------------------|-----------------------|-------------------------------------------------------------------------------------------------------------------------------------------------------------------------------------------------------------------------------------------------------------------------------------------------------------------|
|               |                                    |                       | know... to do something meaningful and not just sit around. That was a little hard. P27-S-1                                                                                                                                                                                                                       |
|               |                                    | No distraction        | Doing nothing negative because there was no distraction<br><br>I: What was the reason for the time passing more slowly?<br>P: I think because I simply couldn't do anything to distract myself. I didn't have anything to read, I couldn't walk around, there was nothing I could do to keep myself busy. P16-S-2 |
|               | Expectations                       |                       | Unspecific expectations regarding the time at the library<br><br>I assumed that time will pass very slowly because there was just nothing to do to keep myself busy. In the end it wasn't that hard and the time went by faster as I had thought at the beginning. P31-S-1                                        |
|               |                                    | Negative expectations | Negative expectations regarding the stay at the library<br><br>Well, the moment I found out that I will sit there and do nothing, I just thought that the time wouldn't pass at all and that it would be quite exhausting and annoying. P5-S-1                                                                    |
|               |                                    | No expectations       | No expectancies regarding the stay<br><br>Expectations? So I had no concrete expectations in advance. I could now at most assume expectations retrospectively. Expectations...no, not really. At the most, I might stumble across something interesting to read. Which was definitely the case. P9-E-2            |
|               | Evaluation of libraries in general |                       | Attitudes toward libraries in general                                                                                                                                                                                                                                                                             |

| Main category   | Codes             | Subcodes              | Definition and Anchor Quotation                                                                                                                                                                                                                                                                                                                                                    |
|-----------------|-------------------|-----------------------|------------------------------------------------------------------------------------------------------------------------------------------------------------------------------------------------------------------------------------------------------------------------------------------------------------------------------------------------------------------------------------|
|                 |                   |                       | Pleasant. It was like a typical library. You have your peace and you had time for yourself, so to speak, whatever you wanted to do. P 39-E-1                                                                                                                                                                                                                                       |
|                 | Personal Benefits |                       | Personal benefits or insights gained from the experiment<br><br>Well, I know, for the rest of the day, I won't be able to have a space for my own and have to do thousand things, then, accordingly, it was like a vacation. Because I knew, on my mind, I get money for that, it was nice. I mean, I get money to sit down somewhere and do nothing – how awesome is that? P8-S-1 |
| Time experience |                   |                       | Abstract thoughts about the time which do not concern direct experiences<br><br>Well, there are moments in which I just sit there and the time seems to be long. So time hasn't dispersed, I'm only a human. P8-S-1                                                                                                                                                                |
|                 | Time awareness    |                       | Opposite of forgetting time, thoughts concerning time; time or passage of time or clock time are present                                                                                                                                                                                                                                                                           |
|                 |                   | Aware of time         | Time... Well, every time I was again thinking about for how long I have to remain seated here, then time was present for me, of course. P27-S-1                                                                                                                                                                                                                                    |
|                 |                   | Desire for a soon end | Desire that the stay comes to an end<br><br>In the end I was wondering when all this would end. P12-E-2                                                                                                                                                                                                                                                                            |

| Main category | Codes | Subcodes                        | Definition and Anchor Quotation                                                                                                                                                                                                                                                                                                                                                         |
|---------------|-------|---------------------------------|-----------------------------------------------------------------------------------------------------------------------------------------------------------------------------------------------------------------------------------------------------------------------------------------------------------------------------------------------------------------------------------------|
|               |       | Very aware of time              | <p>Passage of time very aware</p> <p>At the beginning I still paid a lot of attention to how time passes. P21-S-2</p>                                                                                                                                                                                                                                                                   |
|               |       | Changes in time awareness       | <p>Description when time became more aware</p> <p>Especially present... uh yes, especially in the end I was more and more thinking about how much time already has passed and then, accordingly, the time was more present. As this gong came, time was present because then I knew what time it was, approximately. Those were the moments in which time was very present. P26-S-1</p> |
|               |       | More aware because of tiredness | <p>Time was more aware because the person was tired</p> <p>At some point it [time] started to seem long and as I realized that... Well, first of all, I can't concentrate that much anymore and as I got somehow tired and hungry, I realized that walking around wasn't that satisfying anymore. P32-E-2</p>                                                                           |
|               |       | Time not aware                  | <p>Description of when time was not aware</p> <p>I think a lot of time has passed at the beginning without me realizing it. P16-E-1</p>                                                                                                                                                                                                                                                 |
|               |       | Timeless                        | <p>Forgetting time without goal orientation</p> <p>A feeling that is completely out of time. Distinct to forgetting time, which is limited to forgetting the "clock time".</p>                                                                                                                                                                                                          |

| Main category | Codes           | Subcodes                             | Definition and Anchor Quotation                                                                                                                                                                                                                                                                                                                                                                                                                                                                                                                                                                                                                                                       |
|---------------|-----------------|--------------------------------------|---------------------------------------------------------------------------------------------------------------------------------------------------------------------------------------------------------------------------------------------------------------------------------------------------------------------------------------------------------------------------------------------------------------------------------------------------------------------------------------------------------------------------------------------------------------------------------------------------------------------------------------------------------------------------------------|
|               |                 |                                      | <p>I: And in the moment, when you completely forgot time, can you somehow describe this a little bit more precisely?</p> <p>P: Well, it just wasn't in my head. So I was sitting there (-) and looking at people. And so my attention was just... But I didn't have the feeling that my attention was so completely concentrated, it was more like it was floating around a little bit from one to the other and then I looked at the people. And then sometimes I was thinking "Oh yes, she went out earlier, now she's coming back in", so you attached yourself to the things a bit. But because the thoughts were just floating around, I wasn't thinking about time. P32-S-1</p> |
|               | Forgetting time |                                      | <p>No time awareness, participants report explicitly thinking not about time or forgetting time (Note: Could be combined with timeless sub-code)</p> <p>Yes, I guess I completely forgot the time when my thoughts were elsewhere. P31-E-2</p>                                                                                                                                                                                                                                                                                                                                                                                                                                        |
|               |                 | Evaluation of forgetting time        | <p>Evaluation of forgetting time</p> <p>I guess it's quite... it's quite a good feeling if you don't consciously think about the time right now. But can just enjoy the moment as it is. P17-S-2</p>                                                                                                                                                                                                                                                                                                                                                                                                                                                                                  |
|               |                 | Forgetting time due to concentration | <p>Forgetting time by concentrating on an activity</p> <p>Especially in the end, when I started to deal with the film book. That was really interesting. I stopped thinking about time then. P5-E-2</p>                                                                                                                                                                                                                                                                                                                                                                                                                                                                               |
|               |                 | Forgetting time due to distraction   | Forgetting time through distraction                                                                                                                                                                                                                                                                                                                                                                                                                                                                                                                                                                                                                                                   |

| Main category | Codes                    | Subcodes             | Definition and Anchor Quotation                                                                                                                                                                                                                             |
|---------------|--------------------------|----------------------|-------------------------------------------------------------------------------------------------------------------------------------------------------------------------------------------------------------------------------------------------------------|
|               |                          |                      | Well, I didn't pay much attention to time, because somehow I always found something to do by myself. P39-E-1                                                                                                                                                |
|               | Speed of passage of time |                      | Unspecific description of the perceived speed of time or changes in speed<br><br>I: Okay, now that you think about the passage of time, how did you feel about it today?<br>P: Quite normal, actually. So time didn't pass very fast or very slowly. P5-E-2 |
|               |                          | Fast passage of time | Passage of time is perceived as fast<br><br>I: How would you describe the passage of time?<br>P: Fast, fast, fast, fast, fast. So, like I said, that was very fast for me throughout. P23-S-2                                                               |
|               |                          | Slow passage of time | Passage of time is perceived as slow<br><br>Yeah, it's pretty unusual just to do nothing. Yes, and... yes the feeling that it distorts a bit, you have the feeling that time passes very slowly. P12-S-1                                                    |
|               |                          | Deceleration         | Deceleration/Slowing down of passage of time<br><br>Yes, I would say it has slowed down, so at the beginning I didn't think about it at all, so it was constantly normal and then it rapidly, yes it slowed down rapidly. P12-E-2                           |
|               |                          | Acceleration         | Acceleration of passage of time<br><br>Well, I had to, so I had the feeling that it passes a bit faster without having to exert myself that it passes faster... P21-E-2                                                                                     |
|               |                          | Surprisingly fast    | Surprisingly fast passage of time; surprised about the end of the experiment                                                                                                                                                                                |

| Main category | Codes | Subcodes                               | Definition and Anchor Quotation                                                                                                                                                                                                                                                                                                  |
|---------------|-------|----------------------------------------|----------------------------------------------------------------------------------------------------------------------------------------------------------------------------------------------------------------------------------------------------------------------------------------------------------------------------------|
|               |       |                                        | But just when you came like that I was suddenly surprised that it is now so fast over. So then I thought to myself that it was passed so fast. I did not have the feeling that I had to leave or something. So I was still sitting there quite calmly somehow. P32-S-1                                                           |
|               |       | Influence on speed the passage of time | <p>Descriptions of what affects the perceived speed of passage of time</p> <p>Yes, because somehow I think that by not seeing the time, it went a little faster than if you were staring at the clock while you were sitting there. P5-S-1</p>                                                                                   |
|               |       | Influence of familiarity               | <p>Influence of familiarity or novelty of the situation on the speed of passage of time</p> <p>Yes, of course, at the beginning when I — I had made a small tour before — I felt it passed very quickly. When I had seen everything a little bit and now there were no new paths to take a look at, it dragged a bit. P1-E-2</p> |
|               |       | Influence of atmosphere                | <p>Influence of the atmosphere on the speed of passage of time</p> <p>It could also be that somehow it was the room atmosphere that I simply felt more comfortable there and therefore time passed faster. I can also imagine that. P31-E-2</p>                                                                                  |

| Main category | Codes                | Subcodes                     | Definition and Anchor Quotation                                                                                                                                                                                                                                                                                                                                                                                 |
|---------------|----------------------|------------------------------|-----------------------------------------------------------------------------------------------------------------------------------------------------------------------------------------------------------------------------------------------------------------------------------------------------------------------------------------------------------------------------------------------------------------|
|               |                      | Influence of the activity    | <p>Influence of the activity on the speed of time</p> <p>I felt that the time passed more quickly the last time. But only in the beginning, because then I had something to do. Because I looked at the floors one by one, the books that are there, the shelves. P16-S-2</p>                                                                                                                                   |
|               | Temporal orientation |                              | <p>Influence of temporal orientation on the passage of time</p> <p>But then I thought to myself: no actually it is good, because time passes much slower if I wanted to look at the clock now somehow. And then I would have another point, another orientation point and then I would try to determine the time from any things. That's why I'm actually quite happy that I couldn't read the time. P5-E-2</p> |
|               |                      | No temporal orientation      | <p>No temporal orientation</p> <p>So today time passed a little faster than yesterday, but not so much. Maybe also because yesterday I still had a certain temporal orientation, because I was sitting at the same place all the time, I could see when people took a break and when they came back. And today I didn't have a temporal orientation at all. P5-E-2</p>                                          |
|               |                      | Try not to look at the clock | <p>Avoiding timers</p> <p>When I accidentally looked at a clock. And then in the end I think there's a church somewhere, if you look outside and I wasn't sure if there was a clock and then I avoided looking out there. P27-E-2</p>                                                                                                                                                                           |

| Main category | Codes    | Subcodes                        | Definition and Anchor Quotation                                                                                                                                                                                                                                                                                                                                                      |
|---------------|----------|---------------------------------|--------------------------------------------------------------------------------------------------------------------------------------------------------------------------------------------------------------------------------------------------------------------------------------------------------------------------------------------------------------------------------------|
|               |          | No desire to know the time      | <p>I: And to what extent did you feel the need to know the time?</p> <p>P: No, I didn't really want to know the time. Well, I could have looked at the laptops but actually I didn't really want to know it because I knew... because I felt that if I knew the time, it would go slower. P5-S-1</p>                                                                                 |
|               |          | Desire for temporal orientation | <p>Desire for temporal orientation or explicitly the clock time</p> <p>But when I got impatient, I just wanted, well I didn't look at a clock, but I just wanted to know what time it was, to know for how long I had to sit there. P16-S-2</p>                                                                                                                                      |
|               |          | Feeling that it should be over  | <p>Feeling that it should be over</p> <p>I felt the time was already up and then I always looked to see if you were coming. And I always looked to see if you were coming in the direction I was expecting you to come from. P16-S-2</p>                                                                                                                                             |
|               |          | Time habits                     | <p>Time passing in the experiment is compared with time passing in everyday life or everyday use of time/timers is described</p> <p>But I am not like that in everyday life either, that I am constantly looking at the clock. P31-S-1</p>                                                                                                                                           |
|               | Strategy |                                 | <p>Unspecific comments on strategy application</p> <p>I: And to what extent did you somehow have a strategy for dealing with the time?</p> <p>P: I honestly didn't really have that...because I knew I could keep myself busy and look at books and stuff, and then I didn't feel the need to have that...a strategic consideration to...yes, to do something with time. P31-E-2</p> |

| Main category       | Codes               | Subcodes                           | Definition and Anchor Quotation                                                                                                                                                                                                                                                                   |
|---------------------|---------------------|------------------------------------|---------------------------------------------------------------------------------------------------------------------------------------------------------------------------------------------------------------------------------------------------------------------------------------------------|
|                     |                     |                                    | Strategies that are not named explicitly as such                                                                                                                                                                                                                                                  |
|                     | Implicit strategies |                                    | Time passed very quickly. I don't know why, I was just sitting and doing nothing but thinking, imagining things, thinking things over and that's why it was over very quickly for me, I think. P23-S-2                                                                                            |
|                     |                     | Be aware of oneself                | Conscious feeling of the own body<br><br>I have drawn many comparisons to yesterday's experience. So automatically, so that I feel the way I feel right now, how it feels and so on...and yes. P4-E-2                                                                                             |
|                     |                     | Letting go/accepting the situation | Accepting the situation, letting go<br><br>I think I just...no, I actually accepted the situation a little bit on both sessions. I mean, I'm here for a certain time now, I can't change anything about it, so I tried to let myself drift in time. P32-E-2                                       |
| Explicit strategies |                     |                                    | Activities to structure or forget time                                                                                                                                                                                                                                                            |
|                     |                     | Mindfulness                        | Explicit use of mindfulness strategies<br><br>So that's, well, mindfulness, so that you can see everything in the environment and just be there in the moment and not somewhere else. P34-S-1                                                                                                     |
|                     |                     | Pondering/observing thoughts       | Not directing thoughts, but observing them like in a meditation exercise<br><br>So as I said, when I say I'm going to order my thoughts now, it's not, ok I sit down and have my schedule in my head, but rather like this ah what's coming now. Okay, and then the films start and so on. P8-S-1 |
|                     |                     | Reflection                         | Thinking, ordering thoughts, making plans, solving problems                                                                                                                                                                                                                                       |

| Main category | Codes | Subcodes                  | Definition and Anchor Quotation                                                                                                                                                                                                                                                  |
|---------------|-------|---------------------------|----------------------------------------------------------------------------------------------------------------------------------------------------------------------------------------------------------------------------------------------------------------------------------|
|               |       |                           | I hoped that I could spent the time effectively with all my thoughts and plans and lists in my head that still need to be checked. And I was also a little bit happy about it [...] P16-S-2                                                                                      |
|               |       | Not thinking about time   | Avoiding thoughts on time<br><br>Yes, and then there was a strategy of not thinking about time, but of course that's hard. P5-S-1                                                                                                                                                |
|               |       | Looking at/reading a book | Looking at/reading a book<br><br>I just wandered around there and looked for a book that I could look at again and didn't really find anything at first. And then I just grabbed this book [...] P5-E-2                                                                          |
|               |       | Other                     | Other activities to structure or forget about time<br><br>That's why I just looked at what I had with me and then actually discovered a piece of paper in my wallet and I was forced to become creative in some way. That's why I made myself a little memory game [...] P39-S-2 |
|               |       | Watching people           | Observing other people in the library<br><br>It's kind of like sitting in a theater, because in a room like that, where everyone is totally concentrated on doing one thing, you're suddenly the person who does nothing and gets the role of an observer. P8-S-1                |
|               |       | Counting                  | Counting details<br><br>Yes. So I really focused on keeping the details in mind. That's why I counted desks, or the lamps, or how the walls are organized. P34-E-2                                                                                                               |
|               |       | Exploration description   | Descriptions of the exploration procedure                                                                                                                                                                                                                                        |

| Main category | Codes                   | Subcodes | Definition and Anchor Quotation                                                                                                                                                                                                                                                                            |
|---------------|-------------------------|----------|------------------------------------------------------------------------------------------------------------------------------------------------------------------------------------------------------------------------------------------------------------------------------------------------------------|
|               |                         |          | It was a bit systematic... so I made sure I was on every floor and walked around all the time, but... I don't know if I was everywhere. No, I didn't have a very concrete systematic... so I looked at the plans and checked what other rooms there were [...] P31-E-2                                     |
|               | Seeking out activity    |          | Explicit seeking and desire for an activity<br><br>It was unusual not to have any devices or nothing at all. I don't know, you just try to keep yourself busy, to observe other people or I don't know... to think about something. P27-S-1                                                                |
|               | Conscious perception    |          | Conscious perception or "letting yourself be affected", partly explicit partly implicit strategy<br><br>That's why I've decided a little to wait for what's happening and to perceive everything around me, because I haven't been inside yet. I've already been in the library but always outside. P1-S-1 |
|               | Strategy not successful |          | Strategies do not lead to the desired result<br><br>Then, for example, I sat down and read a couple of books and that's when time didn't really go any faster. P20-E-1                                                                                                                                     |
|               | No strategy             |          | Explicitly no use or search for strategies to deal with time<br><br>Strategies to deal with time... no, I didn't feel like something I have to bear with, but because of that it wasn't something I had to get around quickly so that I would try to somehow count sheep or until 60 or something. P1-S-1  |
| Setting       |                         |          | Situation, environment, premises and their influences                                                                                                                                                                                                                                                      |

| Main category | Codes                     | Subcodes                     | Definition and Anchor Quotation                                                                                                                                                                                                                                                                                                                                                                                                                                                                                             |
|---------------|---------------------------|------------------------------|-----------------------------------------------------------------------------------------------------------------------------------------------------------------------------------------------------------------------------------------------------------------------------------------------------------------------------------------------------------------------------------------------------------------------------------------------------------------------------------------------------------------------------|
|               | Influence of other people |                              | <p>Influence of other people</p> <p>And I also think it's nice that there are always a lot of people around you in the library, you're like in a swarm, you're not quite alone, but everyone does their own thing. You're still somehow like, you're still anonymous. I also wondered if people somehow... if they think it's funny if people would look at me now, because I've somehow walked around the room four times, but also nobody's bothered. Nobody pays attention, everybody just does their thing. P32-E-2</p> |
|               |                           | Atmosphere created by others | <p>Presence of others influences atmosphere</p> <p>Everyone is super busy and into their thing and that was also the case there, but the whole atmosphere is very much focused on efficiency. P8-E-2</p>                                                                                                                                                                                                                                                                                                                    |
|               |                           | Ignoring other people        | <p>Attempt to ignore the other people</p> <p>Whether any people are looking at me strangely because I'm running back and forth all the time and not busy working out something like the others. Or if you're already coming and I see you walking around somewhere. I blanked that out." P5-E-2</p>                                                                                                                                                                                                                         |
|               |                           | Tension/social pressure      | <p>The presence of others promotes tension, pressure to perform, discomfort</p> <p>I found it a really, really terrible experience to go to a place that is characterized by industriousness, by diligence, and to sit there as the only one without having anything close by. P9-S-1</p>                                                                                                                                                                                                                                   |
|               | Time of the day           |                              | Influence of the time of day on the experiment                                                                                                                                                                                                                                                                                                                                                                                                                                                                              |

| Main category | Codes              | Subcodes      | Definition and Anchor Quotation                                                                                                                                                                                                                                                                                                                                                                                                                                                                                                                                                                            |
|---------------|--------------------|---------------|------------------------------------------------------------------------------------------------------------------------------------------------------------------------------------------------------------------------------------------------------------------------------------------------------------------------------------------------------------------------------------------------------------------------------------------------------------------------------------------------------------------------------------------------------------------------------------------------------------|
|               |                    |               | <p>P: Well, the time. So today we started at 5 pm and then it was 11 am. That makes a difference, too.</p> <p>I: In which way?</p> <p>P: Yeah, I think you have more energy at 11 than at 5. P34-E-2</p>                                                                                                                                                                                                                                                                                                                                                                                                   |
|               | Familiar situation |               | <p>Situation known, not unusual</p> <p>I'm actually used to that, I'm in the examination phase now. I've often sat in a library. So I didn't really have a problem with that now. P31-S-1</p>                                                                                                                                                                                                                                                                                                                                                                                                              |
|               | Interior           |               | <p>Unspecific descriptions of the room</p> <p>Room elements: direct architectural elements, high ceilings, chairs, color</p> <p>Room atmosphere: quiet, concentrated, more abstract and characteristic words</p> <p>Then, of course, the core of the library, this terraced middle room over the entire floors. I don't think every library has that. I also think I heard that it has won a prize as a library. I think that attracts a lot of people. And that's why I think it's very crowded here and because it's a very central place. That it looks nice, that attracts a lot of people. P9-E-2</p> |
|               |                    | Lighting      | <p>Description of the lighting conditions</p> <p>I don't know, because if you have no daylight at all, or no parameter to orientate yourself on, it's a bit strange. P17-S-2</p>                                                                                                                                                                                                                                                                                                                                                                                                                           |
|               |                    | Sounds/noises | <p>Descriptions of the soundscape</p> <p>It was very quiet, very, very quiet. Quieter than at Humboldt University, which is already described as very quiet. So I walked on the soft carpet and the</p>                                                                                                                                                                                                                                                                                                                                                                                                    |

| Main category | Codes | Subcodes               | Definition and Anchor Quotation                                                                                                                                                                                                                                                                                   |
|---------------|-------|------------------------|-------------------------------------------------------------------------------------------------------------------------------------------------------------------------------------------------------------------------------------------------------------------------------------------------------------------|
|               |       |                        | clacking from walking was the loudest in the whole library. P5-E-2                                                                                                                                                                                                                                                |
|               |       | Temperature            | <p>Description of the temperature in the library</p> <p>I perceived the temperature as positive because I was here, honestly, the day before yesterday or so to work. I found it much too cold compared to outside and today, for example, I found it pleasant. P32-E-2</p>                                       |
|               |       | Room elements          | <p>Unspecific or neutral description of spatial elements</p> <p>Because there are ten floors, in the last - after the seventh you can't get into any more, no matter what you do. And then it was quite a lot, because there are many corridors, many staircases, many elevators. A lot, a lot, a lot. P8-E-2</p> |
|               |       | Negative room elements | <p>Negative evaluation of room elements</p> <p>P: Yes, exactly. Have you ever looked at the stairways?<br/>I: Yes.<br/>P: They are super ugly, too. So if there were pictures hanging on the wall somehow, then it would work. P8-E-2</p>                                                                         |
|               |       | Positive room elements | <p>Positive evaluation of room elements</p> <p>Nothing negative, but positive that everything is so empty and that you can find a place to sit down in peace and, oh yes, the cafeteria offer is not so nice. But otherwise, great. P2-E-2</p>                                                                    |
|               |       | Room atmosphere        | <p>Description and evaluation of the atmosphere in the library</p> <p>I thought it was all very, yes artificial I must say, because somehow you can... in this room in the middle there is no real daylight and the air...so there</p>                                                                            |

| Main category | Codes | Subcodes                    | Definition and Anchor Quotation                                                                                                                                                                                                                                                                                                                 |
|---------------|-------|-----------------------------|-------------------------------------------------------------------------------------------------------------------------------------------------------------------------------------------------------------------------------------------------------------------------------------------------------------------------------------------------|
|               |       |                             | is always this ventilation in the background. I don't like that. P31-E-2                                                                                                                                                                                                                                                                        |
|               |       | Calming                     | <p>Calming effect of the atmosphere</p> <p>But I think that made me a bit calmer, that yes. But at the same time, a bit like I have to look around." P17-E-1</p>                                                                                                                                                                                |
|               |       | Motivating                  | <p>Room atmosphere is perceived as motivating, a good learning or working atmosphere</p> <p>Yes, I found the atmosphere very pleasant, because I like to have this learning atmosphere around me, because it motivates me to continue learning. P16-S-2</p>                                                                                     |
|               |       | Unpleasant                  | <p>Atmosphere unpleasant, intimidating or uncomfortable</p> <p>I think the atmosphere was also so different. The library is quite intimidating, a lot of people, even some of them said goodbye, for example, or there was a mess on desks. P34-S-2</p>                                                                                         |
|               |       | Pleasant                    | <p>Atmosphere pleasant, friendly, beautiful</p> <p>Pleasant. I like the fact that there were high ceilings, open rooms, you could see far everywhere and yes. I also liked the fact that it wasn't completely, completely quiet. It wasn't so oppressive, but rather relatively open, you could describe it that way, friendly yes. P31-S-1</p> |
|               |       | Influence of the atmosphere | <p>Effect of the room atmosphere</p> <p>I would say that this has made me feel positive. Well, I was positive before, so you can't see the</p>                                                                                                                                                                                                  |

| Main category | Codes           | Subcodes                     | Definition and Anchor Quotation                                                                                                                                                                                                                                                                             |
|---------------|-----------------|------------------------------|-------------------------------------------------------------------------------------------------------------------------------------------------------------------------------------------------------------------------------------------------------------------------------------------------------------|
|               |                 |                              | difference now. But definitely a positive atmosphere. P31-S-1                                                                                                                                                                                                                                               |
|               | Digital devices |                              | Use or absence of technical devices is addressed                                                                                                                                                                                                                                                            |
|               |                 | Use of technical devices     | Use of technical devices<br><br>And since the computer was there, I thought I'd google the opening hours, because they're open on Tuesdays, and then I got up again and walked a little. P16-E-1                                                                                                            |
|               |                 | Absence of technical devices | Influence of the absence of technical devices<br><br>So from the second [session] I take with me that it is pleasant even without mobile phone and music. With the first one, I didn't think that it was so tingling. But you can also relax without technical devices. I believe that in essence." P27-E-2 |
|               | Others          |                              | Interview-related other codes<br><br>I: Ok, is there anything else you would like to share? P: Nope. P26-S-1                                                                                                                                                                                                |

I = Interviewer; P = Participant with Participant-ID-Condition (Exploring/Sitting)-Session (1/2)
